# Supplementary material for: Association between Perceived Trusted of COVID-19 Information Sources and Mental Health during the Early Stage of the Pandemic in Bangladesh
Source: MDPI journal article supplement (doi:10.3390/healthcare10010024), 2021-12-24
Supplement: s1 [file s1]

**Supplementary Table S1.** Mediation analysis

| Pathways and effects                                                                                 |          | $\beta$ | SE   | 95% CI         |
|------------------------------------------------------------------------------------------------------|----------|---------|------|----------------|
| Perceived trust in health media $\rightarrow$ COVID-19 stressors $\rightarrow$ anxiety               |          |         |      |                |
|                                                                                                      | Direct   | 0.22    | 0.27 | -0.31 to 0.75  |
|                                                                                                      | Indirect | 0.36*   | 0.08 | 0.21 to 0.53   |
|                                                                                                      | Total    | 0.58*   | 0.26 | 0.060 to 1.107 |
| Perceived trust in social media $\rightarrow$ COVID-19 stressors $\rightarrow$ anxiety               |          |         |      |                |
|                                                                                                      | Direct   | 0.01*   | 0.06 | -0.11 to 0.14  |
|                                                                                                      | Indirect | 0.05*** | 0.01 | 0.02 to 0.09   |
|                                                                                                      | Total    | 0.07    | 0.06 | -0.05 to 0.19  |
| Perceived trust in traditional media $\rightarrow$ COVID-19 stressors $\rightarrow$ anxiety          |          |         |      |                |
|                                                                                                      | Direct   | 0.12**  | 0.04 | 0.03 to 0.21   |
|                                                                                                      | Indirect | 0.05*** | 0.01 | 0.02 to 0.08   |
|                                                                                                      | Total    | 0.17*** | 0.04 | 0.08 to 0.27   |
| Perceived trust in health media $\rightarrow$ COVID-19 stressors $\rightarrow$ perceived stress      |          |         |      |                |
|                                                                                                      | Direct   | -0.05   | 0.04 | -0.15 to 0.03  |
|                                                                                                      | Indirect | -0.01   | 0.01 | -0.03 to 0.01  |
|                                                                                                      | Total    | -0.6    | 0.04 | 0.14 to -0.16  |
| Perceived trust in social media $\rightarrow$ COVID-19 stressors $\rightarrow$ perceived stress      |          |         |      |                |
|                                                                                                      | Direct   | 0.01    | 0.06 | -0.12 to 0.14  |
|                                                                                                      | Indirect | -0.01   | 0.01 | -0.03 to 0.01  |
|                                                                                                      | Total    | -0.01   | 0.06 | -0.13 to 0.12  |
| Perceived trust in traditional media $\rightarrow$ COVID-19 stressors $\rightarrow$ perceived stress |          |         |      |                |
|                                                                                                      | Direct   | -0.8    | 0.04 | -0.18 to 0.01  |
|                                                                                                      | Indirect | -0.01   | 0.01 | -0.03 to 0.01  |
|                                                                                                      | Total    | -0.09*  | 0.04 | -0.18 to -0.01 |

CI, Confidence Interval; SE, Standard Error;

\* $p < .05$  level, \*\* $p < .01$ , \*\*\* $p < .001$  level (2-tailed).
